# Supplementary material for: An aqueous rechargeable dual-ion hybrid battery based on Zn//LiTi2(PO4)3 electrodes
Source: Royal Society of Chemistry journal article supplement (doi:10.1039/d0se00122h), 2020-01-01
Supplement: d0se00122h1.pdf [file d0se00122h1.pdf]

## SUPPORTING INFORMATION

### An aqueous rechargeable dual-ion hybrid battery based on Zn//LiTi<sub>2</sub>(PO<sub>4</sub>)<sub>3</sub> electrodes

Zishuai Zhang<sup>1</sup>, Yu Zhou<sup>1</sup>, Qiang Ru<sup>1</sup>, Ching-yuan Su<sup>2</sup>, Linfeng Sun<sup>3</sup>, Xianhua Hou<sup>1\*</sup>,  
Fuming Chen<sup>1\*</sup>

<sup>1</sup>Guangdong Provincial Key Laboratory of Quantum Engineering and Quantum Materials, Guangdong Engineering Technology Research Center of Efficient Green Energy and Environment Protection Materials, School of Physics and Telecommunication Engineering, South China Normal University, Guangzhou 510006  
fmchen@m.scnu.edu.cn; houxianhua@m.scnu.edu.cn

<sup>2</sup>Graduate Institute of Energy Engineering, National Central University, Tao-Yuan 32001, Taiwan

<sup>3</sup>Department of Energy Science, Sungkyunkwan University, Suwon 16419, Korea

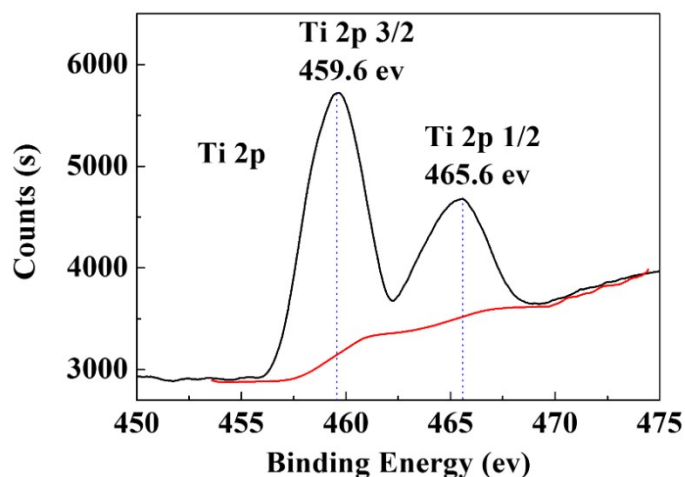

Fig S1 High resolution XPS spectrum of Ti in as-prepared LiTi<sub>2</sub>(PO<sub>4</sub>)<sub>3</sub>@C.

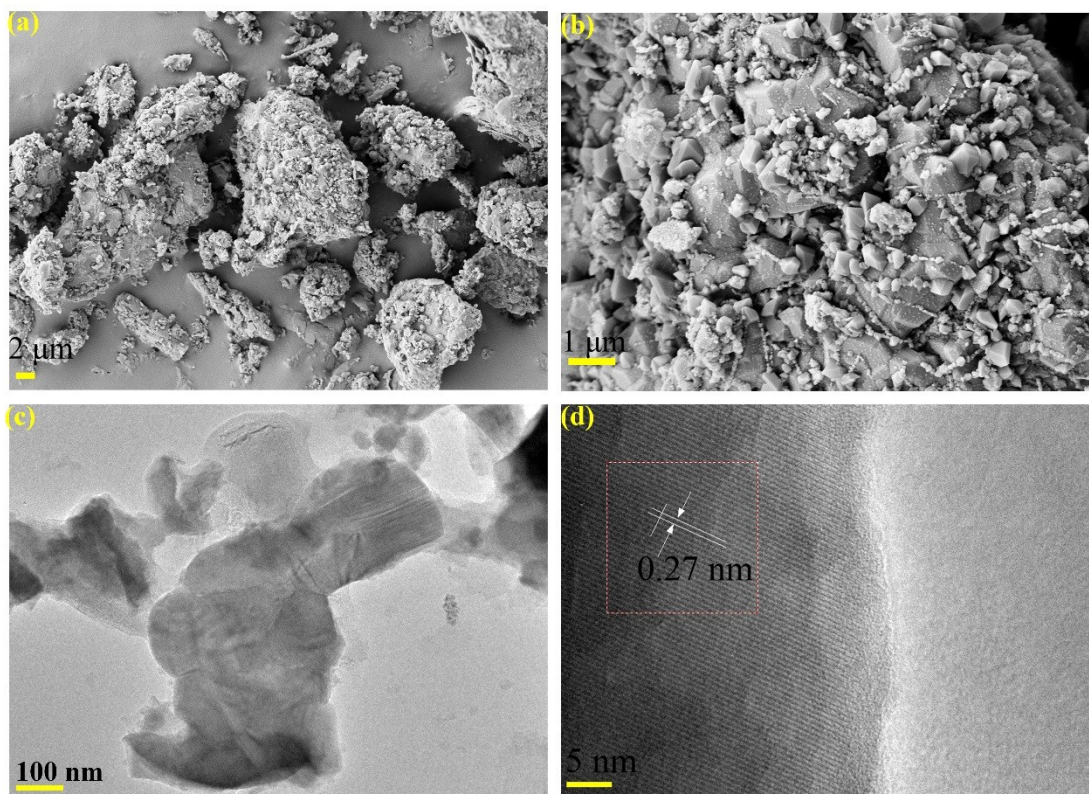

Fig S2 Scanning electron microscopy (SEM) images of  $\text{LiTi}_2(\text{PO}_4)_3@\text{C}$  (a) and (b). Transmission electron microscopy (TEM) images of  $\text{LiTi}_2(\text{PO}_4)_3@\text{C}$  (c) and (d).

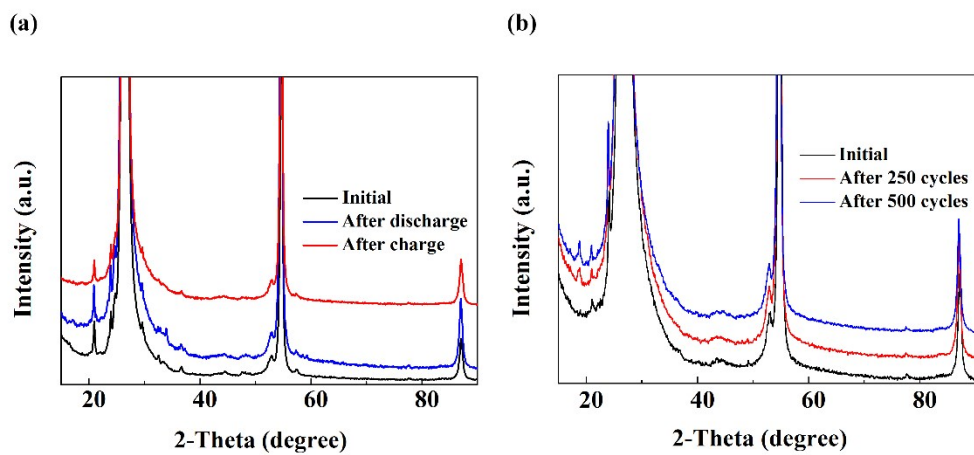

Fig S3 XRD patterns of  $\text{LiTi}_2(\text{PO}_4)_3$  cathode in initial state, after discharge state, and charge state (a) and (b) in fresh state, after 250 cycles and 500 cycles.

Table S1. The comparison of the current system and other aqueous batteries

| Cathode                                                                       | Anode                                                | Electrolyte                                                            | Testing voltage (V) | Current rate                         | Capacity (mAh g <sup>-1</sup> ) | Ref          |
|-------------------------------------------------------------------------------|------------------------------------------------------|------------------------------------------------------------------------|---------------------|--------------------------------------|---------------------------------|--------------|
| LiTi <sub>2</sub> (PO <sub>4</sub> ) <sub>3</sub> /C                          | Zn                                                   | 0.5M ZnSO <sub>4</sub> +<br>0.25M Li <sub>2</sub> SO <sub>4</sub>      | 0-1.2               | 12C<br>(1C=138 mA g <sup>-1</sup> )  | 48.52 (500 cycles)              | This work    |
| Li <sub>3</sub> V <sub>2</sub> (PO <sub>4</sub> ) <sub>3</sub>                | Zn                                                   | 2 M ZnSO <sub>4</sub><br>+1 M Li <sub>2</sub> SO <sub>4</sub>          | 0.7-2.1             | 0.2C<br>(1C=133 mA g <sup>-1</sup> ) | 86.7 (200 cycles)               | <sup>1</sup> |
| Na <sub>3</sub> V <sub>2</sub> (PO <sub>4</sub> ) <sub>3</sub>                | Zn                                                   | 2 M ZnSO <sub>4</sub><br>+1 M Li <sub>2</sub> SO <sub>4</sub>          | 0.7-2.1             | 0.2C<br>(1C=118 mA g <sup>-1</sup> ) | 95 (200 cycles)                 | <sup>1</sup> |
| Na <sub>3</sub> V <sub>2</sub> (PO <sub>4</sub> ) <sub>3</sub>                | Zn                                                   | 0.5M Zn(CH <sub>3</sub> COO) <sub>2</sub>                              | 0.8-1.7             | 0.5C<br>(1C=118 mA g <sup>-1</sup> ) | 72 (100 cycles)                 | <sup>2</sup> |
| Na <sub>3</sub> V <sub>2</sub> (PO <sub>4</sub> ) <sub>3</sub> /C             | Zn                                                   | 1M Zn(CH <sub>3</sub> COO) <sub>2</sub><br>+0.5M CH <sub>3</sub> COONa | 0.8-1.7             | 0.5C<br>(1C=118 mA g <sup>-1</sup> ) | 70.84 (200 cycles)              | <sup>3</sup> |
| Na <sub>3</sub> V <sub>2</sub> (PO <sub>4</sub> ) <sub>2</sub> F <sub>3</sub> | Zn                                                   | 2M Zn(CH <sub>3</sub> F <sub>3</sub> SO <sub>3</sub> ) <sub>2</sub>    | 0.8-1.9             | 80 mA g <sup>-1</sup>                | 46 (4000 cycles)                | <sup>4</sup> |
| LiMn <sub>2</sub> O <sub>4</sub>                                              | LiTi <sub>2</sub> (PO <sub>4</sub> ) <sub>3</sub> /C | 1M Li <sub>2</sub> SO <sub>4</sub>                                     | 0-1.8               | 0.2C<br>(1C=138 mA g <sup>-1</sup> ) | 114 (100 cycles)                | <sup>5</sup> |

References:

1. H. B. Zhao, C. J. Hu, H. W. Cheng, J. H. Fang, Y. P. Xie, W. Y. Fang, T. N. L. Doan, T. K. A. Hoang, J. Q. Xu and P. Chen, *Scientific Reports*, 2016, **6**.
2. G. Li, Z. Yang, Y. Jiang, C. Jin, W. Huang, X. Ding and Y. Huang, *Nano Energy*, 2016, **25**, 211-217.
3. G. Li, Z. Yang, Y. Jiang, W. Zhang and Y. Huang, *Journal of Power Sources*, 2016, **308**, 52-57.
4. W. Li, K. Wang, S. Cheng and K. Jiang, *Energy Storage Materials*, 2018, **15**, 14-21.
5. Z. Huang, L. Liu, Q. Zhou, J. Tan, Z. Yan, D. Xia, H. Shu, X. Yang and X. Wang, *Journal of Power Sources*, 2015, **294**, 650-657.
